# Supplementary material for: Metabolomics Studies on Cytoplasmic Male Sterility during Flower Bud Development in Soybean
Source: MDPI journal article supplement (doi:10.3390/ijms20122869), 2019-06-12
Supplement: s1 [file s1]

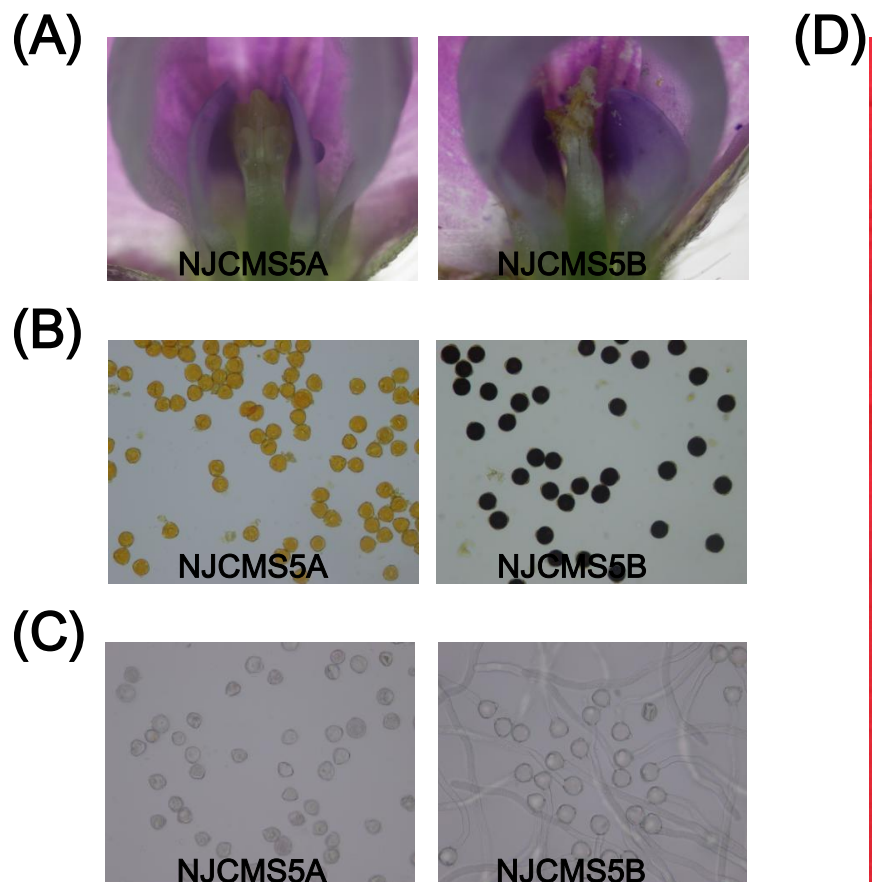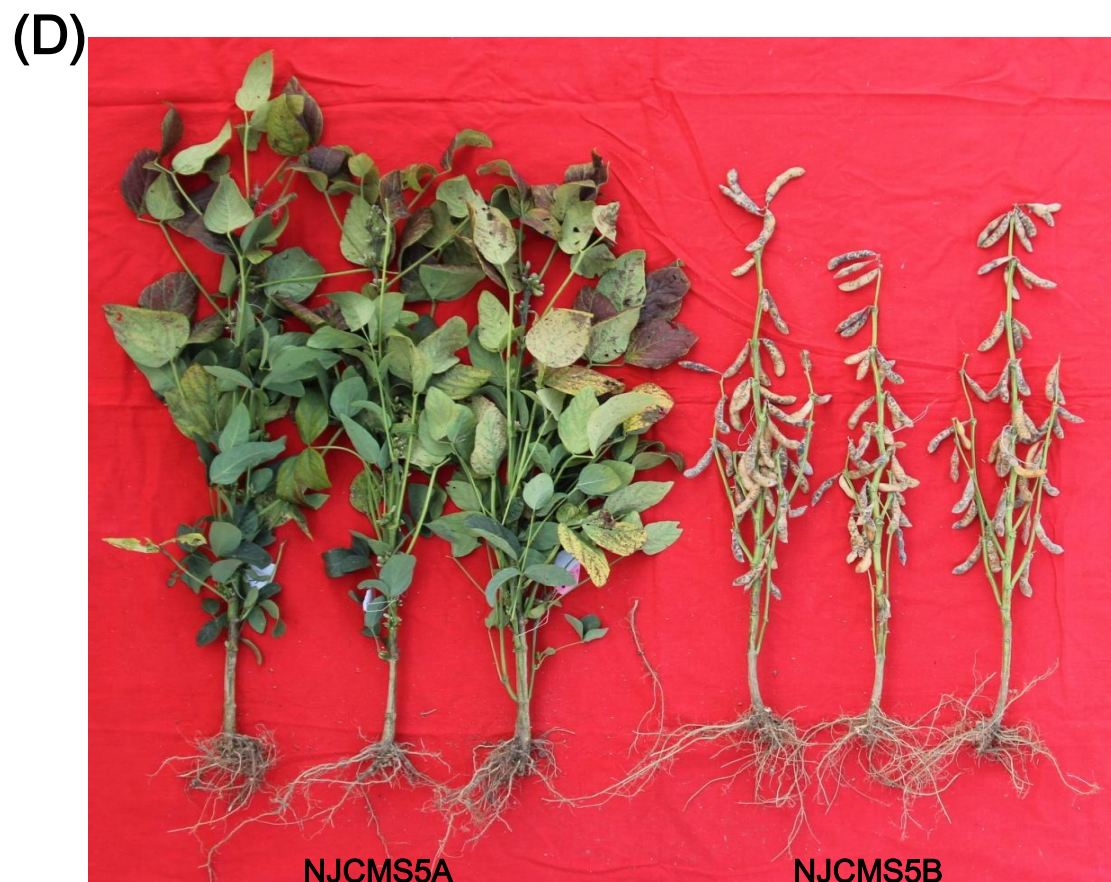

**Figure S1 Morphological of anther, pollen and plant in NJCMS5A and NJCMS5B.** (A) Anther dehiscence observed using 45× stereo microscope. (B) Pollen stained using 1% I<sub>2</sub>-KI (100× microscope). (C) Pollen germination of NJCMS5A and NJCMS5B (100× microscope). (D) The plants of NJCMS5A and NJCMS5B during maturing in the field.
